# Supplementary material for: Phosphorus–nitrogen compounds. Part 37. Syntheses and structural characterizations, biological activities of mono and bis(4-fluorobenzyl)spirocyclotetraphosphazenes
Source: Royal Society of Chemistry journal article supplement (doi:10.1039/c7nj00478h), 2017-01-01
Supplement: c7nj00478h1.pdf [file c7nj00478h1.pdf]

## Supplementary Info

### **Phosphorus-nitrogen compounds. Part 37. Syntheses and structural characterizations, biological activities of mono and bis(4-fluorobenzyl)spirocyclotetraphosphazenes**

Gamze Elmas<sup>\*a</sup>, Aytuğ Okumuş<sup>a</sup>, Pelin Sevinç<sup>a</sup>, Zeynel Kılıç<sup>\*a</sup>, Leyla Açıkb, Mustafa Atalan<sup>b</sup>, Mustafa Türk<sup>c</sup>, Gökberk Deniz<sup>d</sup>, Tuncer Hökelek<sup>e</sup>

<sup>a</sup>*Department of Chemistry, Ankara University, 06100 Ankara, Turkey*

<sup>b</sup>*Department of Biology, Gazi University, 06500 Ankara, Turkey*

<sup>c</sup>*Department of Bioengineering, Kırıkkale University, 71450 Yahşihan-Kırıkkale, Turkey*

<sup>d</sup>*Faculty of Medicine, Hacettepe University, 06100 Ankara, Turkey*

<sup>e</sup>*Department of Physics, Hacettepe University, 06800 Ankara, Turkey*

E-mail address: zkilic@science.ankara.edu.tr (Z. Kılıç)  
gegemen@ankara.edu.tr (G. Elmas)

#### **Contents:**

#### Figures

- **Fig. S1** The conformations of (a) the tetramer ring, (b) the all rings and (c) the five-membered spiro-ring of **7**.
- **Fig. S2** The conformations of (a) the tetramer ring, (b) the all rings and (c) the six-membered spiro-ring of **9**.
- **Fig. S3** The conformations of (a) the tetramer ring, (b) the all rings and (c) the six-membered spiro-ring of **12**.
- **Fig. S4** The packing diagram of compound **9**.
- **Fig. S5** The packing diagram of compound **12**.

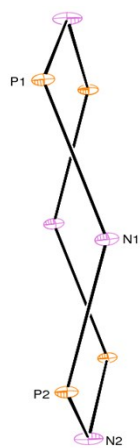

(a)

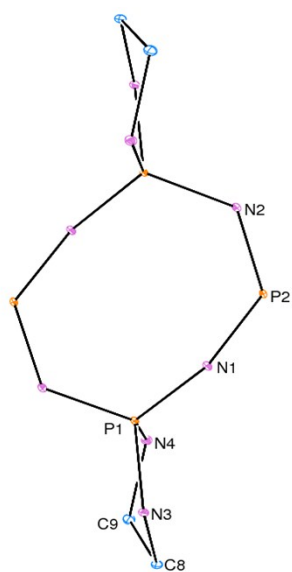

(b)

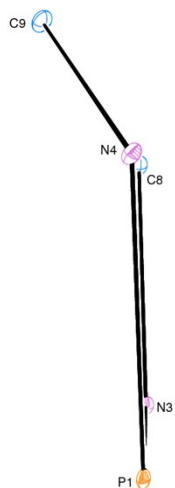

(c)

**Fig. S1** The conformations of (a) the tetramer ring, (b) the all rings and (c) the five-membered spiro-ring of 7.

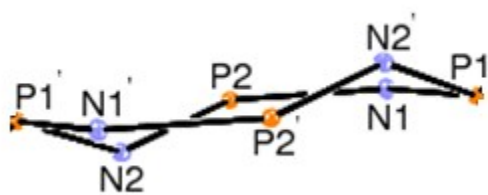

(a)

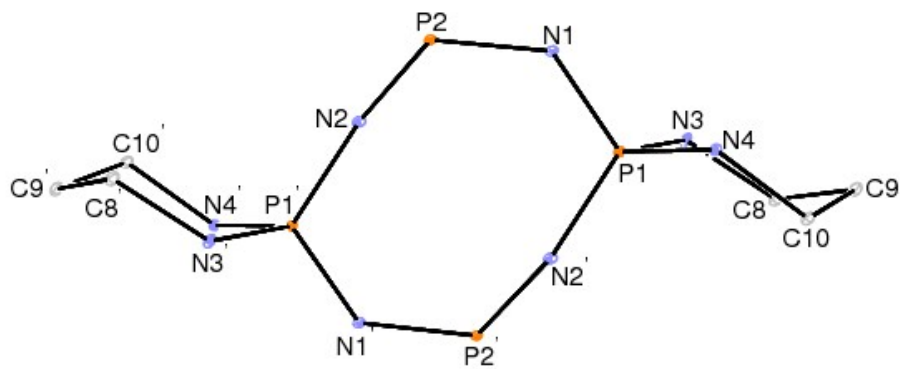

(b)

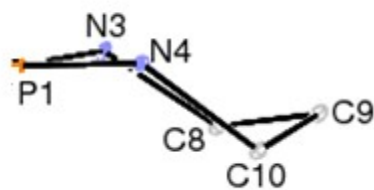

(c)

**Fig. S2** The conformations of (a) the tetramer ring, (b) the all rings and (c) the six-membered spiro-ring of **9**.

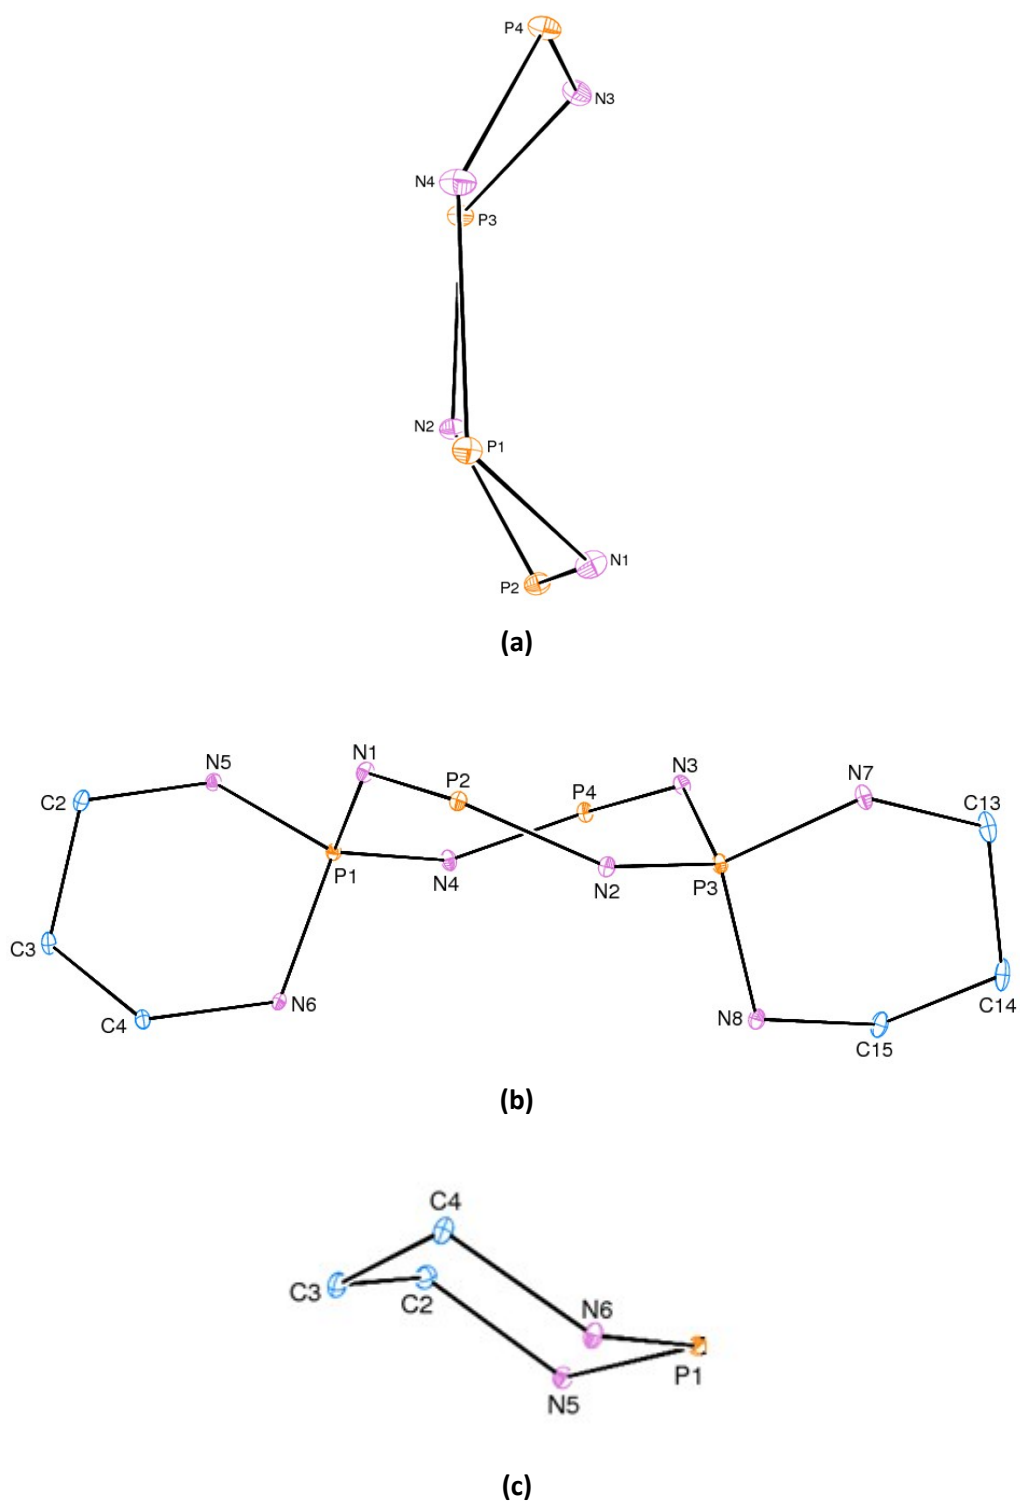

**Fig. S3** The conformations of (a) the tetramer ring, (b) the all rings and (c) the six-membered spiro-ring of **12**.

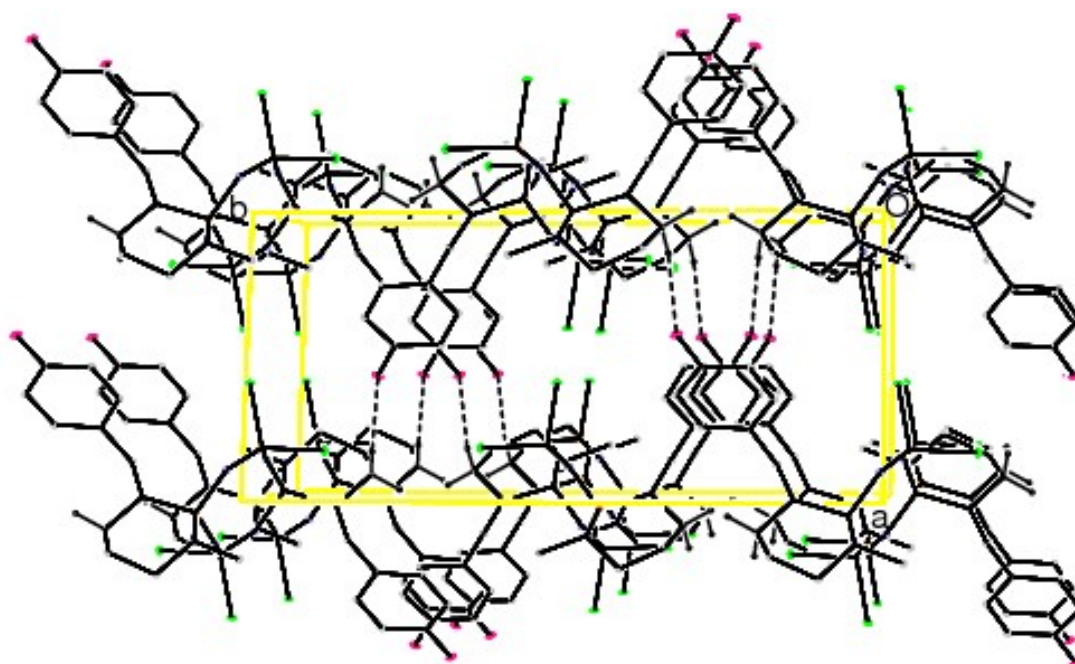

**Fig. S4** The packing diagram of compound **9**.

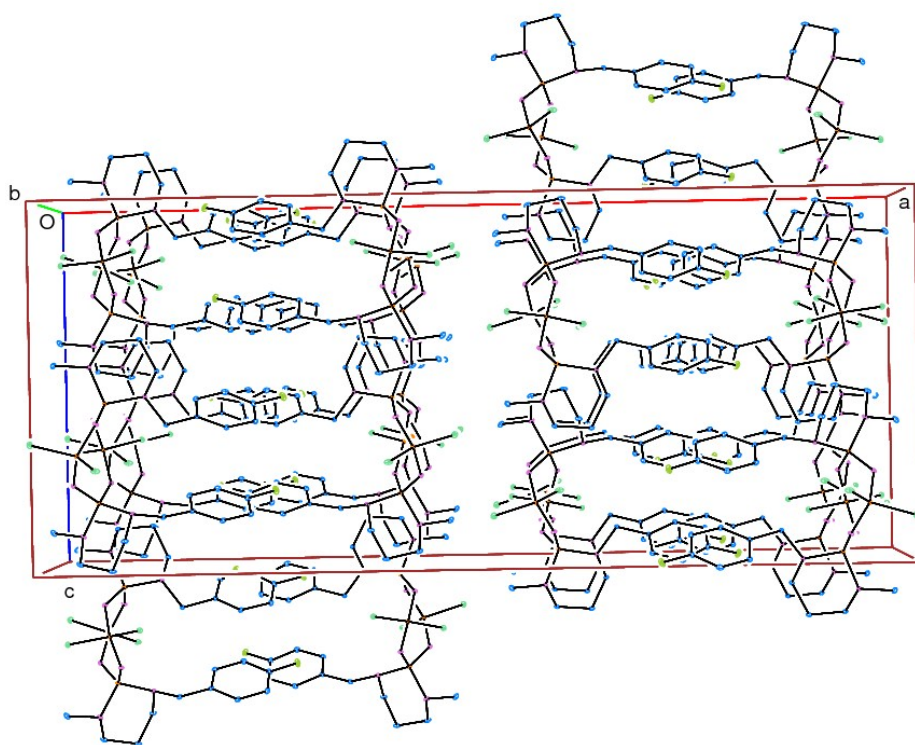

**Fig. S5** The packing diagram of compound **12**.
